# Supplementary material for: Discovery of a specific inhibitor of human GLUT5 by virtual screening and in vitro transport evaluation
Source: PubMed Central journal article supplement (PMC4831007; doi:10.1038/srep24240), 2016-04-14
Supplement: srep24240-s1.pdf [file srep24240-s1.pdf]

## Supplementary Information

### Discovery of a specific inhibitor of human GLUT5 by virtual screening and *in vitro* transport evaluation

Alayna M. George Thompson<sup>1\*</sup>, Oleg Ursu<sup>2\*</sup>, Petr Babkin<sup>1\*</sup>, Cristina V. Iancu<sup>1</sup>, Alex  
Whang<sup>1</sup>, Tudor I. Oprea<sup>2</sup> and Jun-yong Choe<sup>1</sup>

Supplementary Figure S1

Supplementary Figure S2

Supplementary Figure S3

Supplementary Figure S4

Supplementary Figure S5

Supplementary Table S1

**Supplementary Figure S1: Overlay of GLUT5 homology models based on GlcP<sub>se</sub> (4LDS), human GLUT1 (4PYP) and bovine GLUT5 (4YB9) crystal structures.**

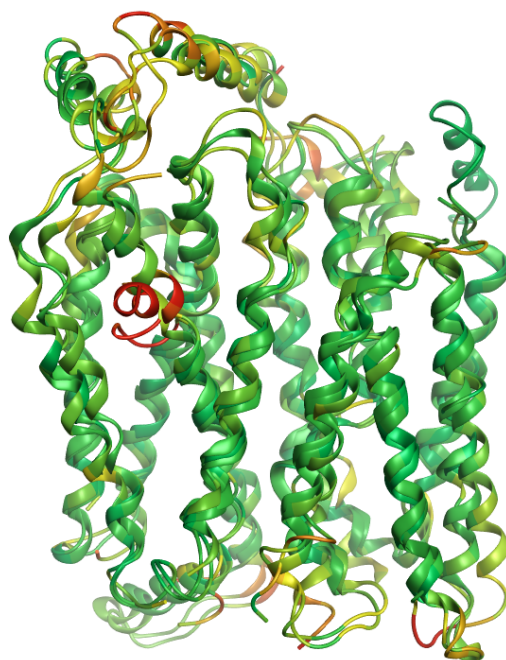

Root mean squared deviation (RMSD) in C $\alpha$  atoms of GLUT5 homology models are color-coded: green for small deviations (dark green less than 2 Å, light green 2-3 Å), yellow for medium deviations (3-4.5 Å) and red for the largest deviations (up to 10 Å in loop regions). Overall RMSD is ~2.5 Å and 1.5 Å in the transmembrane helix core.

Figure was generated in MOE.

**Supplementary Figure S2: Glucose uptake into MCF7 cells.**

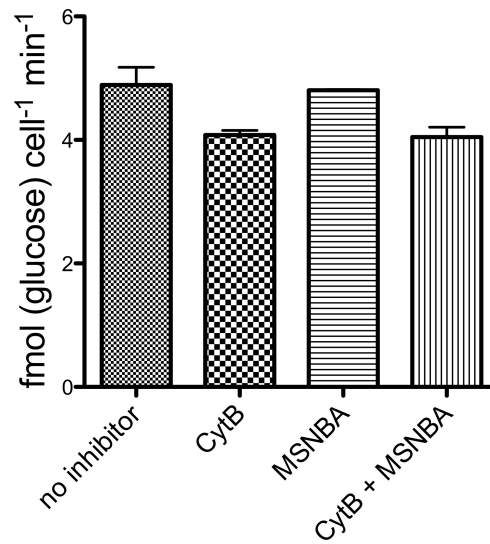

Cytochalasin B (CytB, 50  $\mu$ M) and MSNBA (60  $\mu$ M) were pre-incubated with MCF7 cells for five minutes before initiation of uptake by the addition of C<sup>14</sup>-glucose. Uptake was stopped after thirty minutes and measured as described in Materials and Methods.

**Supplementary Figure S3: Time course of fructose uptake in MCF7 cells.**

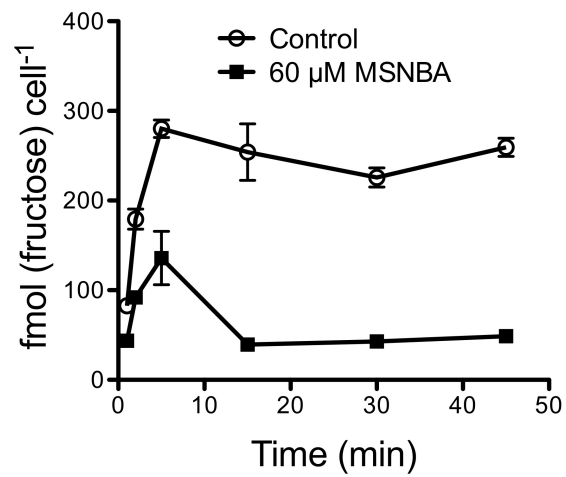

Fructose uptake into MCF7 cells over time with 50 μM cytochalasin B in all conditions in the absence (Control – empty circles) or presence of 60 μM MSNBA (60 μM MSNBA – filled squares). Cells were pre-incubated for five minutes with inhibitors before initiation of uptake by the addition of C<sup>14</sup>-fructose.

**Supplementary Figure S4: Close-up of interactions between MSNBA and side chains of GLUT5.**

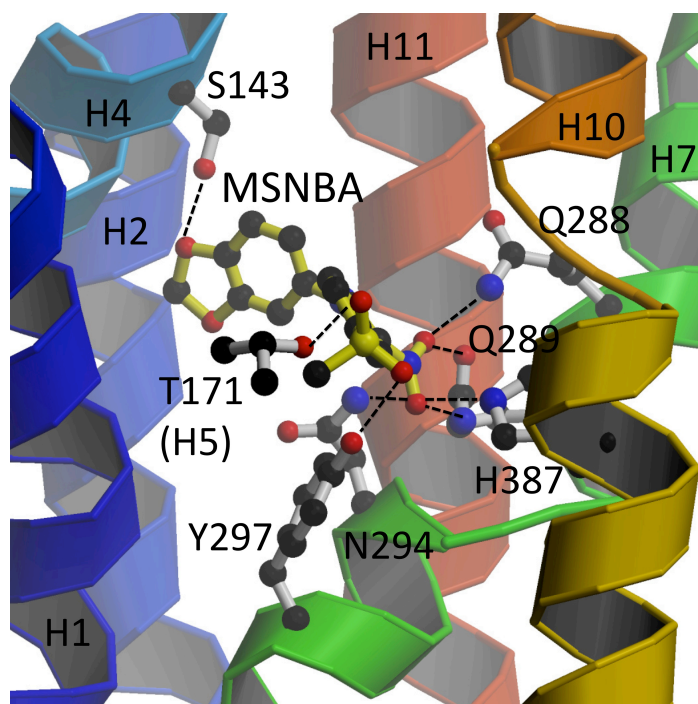

Interacting residues come from helices 4 (S143), 5 (T171), 7 (Q288, Q289, N294 and Y297), and 10 (H387). Helix 5 was omitted for clarity. Figure was drawn with Molscript<sup>46</sup> and raster3D<sup>47</sup>.

**Supplementary Figure S5: Michaelis-Menten plot for glucose uptake by GlcP<sub>Se,F348H</sub>, in RSO vesicles.**

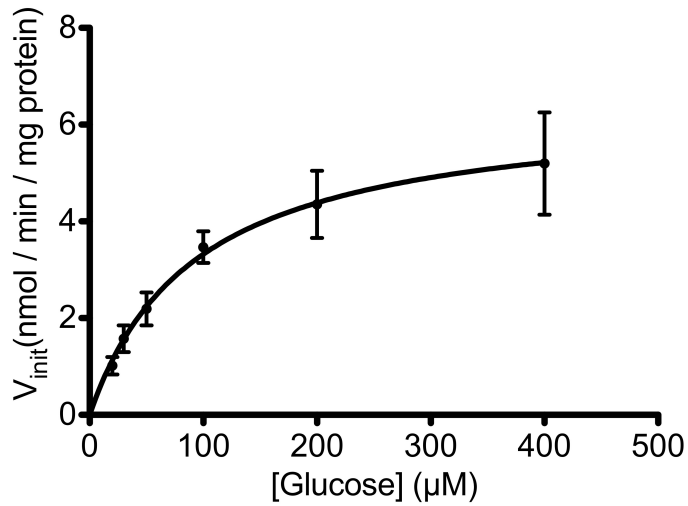

The experiments were conducted in JM1100 *E. coli* cells expressing GlcP<sub>Se,F348H</sub>. Assay was performed at different glucose concentrations and stopped one minute after addition of C<sup>14</sup>-glucose. Transport kinetic parameters were determined with Prism (GraphPad Software):  $K_M = 94 \pm 19 \mu\text{M}$ ,  $V_{max} = 6.4 \pm 0.5 \text{ nmol/min/mg}$ . Error bar is standard deviation from 3 different measurements.

**Supplementary Table S1. Compounds tested for GLUT5 transport inhibition in proteoliposomes by entrance counter-flow assay. MSNBA is in bold and red characters.**

| SMILES                                                                | Supplier              | MW     | CHEM_NAME                                                                           |
|-----------------------------------------------------------------------|-----------------------|--------|-------------------------------------------------------------------------------------|
| <chem>[N+](=O)([O-])c1c(ccc(c1)C)NC2OC(C(C2O)O)CO</chem>              | ChemBridge            | 284.27 | N-(4-methyl-2-nitrophenyl)pentofuranosylamine                                       |
| <chem>[N+](=O)([O-])c1c(cccc1)NC2OC(C(C2O)O)CO</chem>                 | ChemBridge            | 270.24 | N-(2-nitrophenyl)pentofuranosylamine                                                |
| <chem>[N+](=O)([O-])c1c(ccc(c1)C#N)NCc2cc(c(cc2)O)O</chem>            | Enamine               | 285.26 | 4-[(3,4-dihydroxybenzyl)amino]-3-nitrobenzotrile                                    |
| <chem>[N+](=O)([O-])c1c(ccc(c1)[N+](=O)[O-])NCCCCO</chem>             | ChemDiv               | 255.23 | 4-(2,4-dinitroanilino)-1-butanol                                                    |
| <chem>N(CC2OC(C(C2O)O)CO)c1ccc(cc1)C</chem>                           | Labotest              | 253.3  | 2,5-anhydro-1-deoxy-1-(4-toluidino)hexitol                                          |
| <chem>[S](=O)(=O)(C)c1cc(c(cc1)NCc2c(ccc(c2)OC)OC)[N+](=O)[O-]</chem> | Enamine               | 366.39 | N-(2,5-dimethoxybenzyl)-N-[4-(methylsulfonyl)-2-nitrophenyl]amine                   |
| <chem>[S](=O)(=O)(C)c1cc(c(cc1)NCC2OCCC2)[N+](=O)[O-]</chem>          | Enamine               | 300.34 | 4-(methylsulfonyl)-2-nitro-N-(tetrahydro-2-furanylmethyl)aniline                    |
| <chem>[N+](=O)([O-])c1c(ccc(c1)[N+](=O)[O-])NCCNCCO</chem>            | Vitas-M               | 270.24 | 2-[[2-(2,4-dinitroanilino)ethyl]amino]ethanol                                       |
| <chem>[N+](=O)([O-])c1ccc(cc1)NC2OC(C(C2O)O)CO</chem>                 | ChemBridge            | 270.24 | N-(4-nitrophenyl)pentofuranosylamine                                                |
| <chem>Clc1c(ccc(c1)[N+](=O)[O-])NCc2cc(c(cc2)OC)O</chem>              | Enamine               | 308.72 | 5-[(2-chloro-4-nitroanilino)methyl]-2-methoxyphenol                                 |
| <chem>[n]2(ncnc2)C1OC(C(C1O)O)CO</chem>                               | AMS Private           | 201.18 | 2-(hydroxymethyl)-5-(1H-1,2,4-triazol-1-yl)tetrahydrofuran-3,4-diol                 |
| <chem>[S](=O)(=O)(C)c1cc(c(cc1)NCCc2nc(n[o]2)N)[N+](=O)[O-]</chem>    | Enamine               | 327.32 | N-[2-(3-amino-1,2,4-oxadiazol-5-yl)ethyl]-N-[4-(methylsulfonyl)-2-nitrophenyl]amine |
| <chem>[N+](=O)([O-])c1cc(c(cc1)NCc2ccc(cc2)N)C(=O)OC</chem>           | Key Organics / BIONET | 301.3  | methyl 2-[(4-aminobenzyl)amino]-5-nitrobenzoate                                     |
| <chem>[N+](=O)([O-])c1c(ccc(c1)C(=O)C)NCc2cc(c(c(c2)C)O)C</chem>      | Enamine               | 314.34 | 1-[4-[(4-hydroxy-3,5-dimethylbenzyl)amino]-3-nitrophenyl]ethanone                   |
| <chem>[N+](=O)([O-])c1cc(c(cc1)NCC2[o]ccc2)C(=O)O</chem>              | Maybridge Ltd         | 262.22 | 2-[(2-furylmethyl)amino]-5-nitrobenzoic acid                                        |
| <chem>[N+](=O)([O-])c1c(ccc(c1)C(=O)C)NCc2c(nc(cc2C)C)O</chem>        | Enamine               | 315.33 | 1-(4-[[2-(2-hydroxy-4,6-dimethyl-3-pyridinyl)methyl]amino]-3-nitrophenyl)ethanone   |
| <chem>[N+](=O)([O-])c1cc(c(cc1)NCC2C(CCC2)O)C(=O)NC</chem>            | Enamine               | 293.32 | 2-[[2-(2-hydroxycyclopentyl)methyl]amino]-N-methyl-5-nitrobenzamide                 |
| <chem>[S](=O)(=O)(C)c1cc(c(cc1)NCC2[o]ccc2)[N+](=O)[O-]</chem>        | Enamine               | 296.3  | N-(2-furylmethyl)-4-(methylsulfonyl)-2-nitroaniline                                 |
| <chem>[S](=O)(=O)(N)c1cc(c(cc1)NCC2OCCC2)[N+](=O)[O-]</chem>          | Enamine               | 301.32 | 3-nitro-4-[(tetrahydro-2-furanylmethyl)amino]benzenesulfonamide                     |
| <chem>[N+](=O)([O-])c1c(ccc(c1)C(=O)C)NCc2c(ccc(c2)OC)OC</chem>       | Enamine               | 330.34 | 1-[4-[(2,5-dimethoxybenzyl)amino]-3-nitrophenyl]ethanone                            |
| <chem>[S](=O)(=O)(N)c1cc(c(cc1)NCCc2c([nH]nc2O)C)[N+](=O)[O-]</chem>  | Enamine               | 341.35 | 4-[[2-(3-hydroxy-5-methyl-1H-pyrazol-4-yl)ethyl]amino]-3-nitrobenzenesulfonamide    |
| <chem>[N+](=O)([O-])c1c(ccc(c1)C(=O)O)NC(C)c2ncccc2</chem>            | Enamine               | 287.27 | 3-nitro-4-[[1-(2-pyridinyl)ethyl]amino]benzoic acid                                 |
| <chem>S([C@H]2OC(C(C2O)O)[C@@H](O)CO)c1ccccc1</chem>                  | Sigma-Aldrich         | 272.32 | phenyl 1-thio-beta-L-erythro-hexofuranoside                                         |
| <chem>Fc1c(ccc(c1)[N+](=O)[O-])NCc2cc(c(cc2)O)OC</chem>               | Enamine               | 292.27 | 4-[(2-fluoro-4-nitroanilino)methyl]-2-methoxyphenol                                 |
| <chem>[s]1c(nc(c1)CNc2c(cc(cc2)C(=O)C)[N+](=O)[O-])NC</chem>          | Enamine               | 306.35 | 1-[4-([2-(methylamino)-1,3-thiazol-4-yl]methyl)amino]-3-nitrophenyl]ethanone        |

|                                                                             |               |        |                                                                                         |
|-----------------------------------------------------------------------------|---------------|--------|-----------------------------------------------------------------------------------------|
| <chem>[N+](=O)([O-])c1c(ccc(c1)C(=O)C)Nc2cc(c(cc2)OC)O</chem>               | Enamine       | 302.29 | 1-[4-(3-hydroxy-4-methoxyanilino)-3-nitrophenyl]ethanone                                |
| <chem>[N+](=O)([O-])c1c(ccc(c1)C(=O)O)NCc2ccccc2</chem>                     | ChemDiv       | 272.26 | 4-(benzylamino)-3-nitrobenzoic acid                                                     |
| <chem>[N+](=O)([O-])c1c(ccc(c1)c3n[o]c(n3)C)NCC2OCCC2</chem>                | Vitas-M       | 304.31 | N-[4-(5-methyl-1,2,4-oxadiazol-3-yl)-2-nitrophenyl]-N-(tetrahydro-2-furanylmethyl)amine |
| <chem>[N+](=O)([O-])c1cc(c(cc1)NCc2c(nc(cc2)C)O)COC</chem>                  | Enamine       | 317.34 |                                                                                         |
| <chem>[Na+].[S](=O)(=O)([O-])CCNc1c(cc(cc1)[N+](=O)[O-])[N+](=O)[O-]</chem> | Sigma-Aldrich | 313.22 | sodium 2-(2,4-dinitroanilino)ethanesulfonate                                            |
| <chem>[N+](=O)([O-])c1cc(c(cc1)NCc2nc[o]c2C)C(=O)OC</chem>                  | Enamine       | 291.26 |                                                                                         |
| <chem>[S](=O)(=O)(C)c1cc(c(cc1)Nc2cc(c(cc2)OC)OC)[N+](=O)[O-]</chem>        | Enamine       | 352.37 | N-(3,4-dimethoxyphenyl)-4-(methylsulfonyl)-2-nitroaniline                               |
| <chem>Clc1cc(c(cc1)NC2OC(C(C(C2O)O)O)C)[N+](=O)[O-]</chem>                  | ChemBridge    | 318.71 | N-(4-chloro-2-nitrophenyl)-6-deoxyhexopyranosylamine                                    |
| <chem>[N+](=O)([O-])c1cc(c(cc1)NCc2c(c(ccc2)OC)O)OC</chem>                  | Sigma-Aldrich | 304.3  | 2-methoxy-6-[(2-methoxy-4-nitroanilino)methyl]phenol                                    |
| <chem>O1C(C(C(C1CO)O)O)OC(=O)c2ccccc2</chem>                                | Sigma-Aldrich | 254.24 | 1-O-benzoyl-D-ribofuranose                                                              |
| <chem>[N+](=O)([O-])c1c(ccc(c1)C(=O)C)NC2CCC(CC2)O</chem>                   | Enamine       | 278.31 | 1-{4-[(4-hydroxycyclohexyl)amino]-3-nitrophenyl}ethanone                                |
| <chem>FC(F)(F)c1cc(c(cc1)NCc2cc(c(cc2)OC)OC)[N+](=O)[O-]</chem>             | ChemBridge    | 356.3  | N-(3,4-dimethoxybenzyl)-2-nitro-4-(trifluoromethyl)aniline                              |
| <chem>[N+](=O)([O-])c1c(ccc(c1)C(=O)C)NCC(CO)Cc2[o]ccc2</chem>              | Enamine       | 318.33 | 1-(4-[[3-(2-furyl)-2-(hydroxymethyl)propyl]amino]-3-nitrophenyl)ethanone                |
| <chem>[S](=O)(=O)(C)c1cc(c(cc1)NCc2cc(ncc2)OC)[N+](=O)[O-]</chem>           | Enamine       | 337.36 | N-[(2-methoxy-4-pyridinyl)methyl]-N-[4-(methylsulfonyl)-2-nitrophenyl]amine             |
| <chem>[S](=O)(=O)(N)c1cc(c(cc1)NCC(=O)N2CCC(CC2)O)[N+](=O)[O-]</chem>       | Enamine       | 358.38 | 4-[[2-(4-hydroxy-1-piperidinyl)-2-oxoethyl]amino]-3-nitrobenzenesulfonamide             |
| <chem>FC(F)(F)c1c(cc(c(c1)[N+](=O)[O-])NCc2nc(c(cc2)C(O)C)C)Cl</chem>       | Enamine       | 389.76 |                                                                                         |
| <chem>Fc1c(ccc(c1)C(Nc2c(cc(cc2)[S](=O)(=O)C)[N+](=O)[O-])C)OC</chem>       | Enamine       | 368.39 | N-[1-(3-fluoro-4-methoxyphenyl)ethyl]-4-(methylsulfonyl)-2-nitroaniline                 |
| <chem>FC(F)(F)C(O)CCNc1c(cc(cc1)[N+](=O)[O-])C(=O)OC</chem>                 | Enamine       | 322.24 | methyl 5-nitro-2-[(4,4,4-trifluoro-3-hydroxybutyl)amino]benzoate                        |
| <chem>[S](=O)(=O)(C)c1c(ccc(c1)[S](=O)(=O)C)NCCOCCO</chem>                  | Enamine       | 337.42 | 2-{2-[2,4-bis(methylsulfonyl)anilino]ethoxy}ethanol                                     |
| <chem>[N+](=O)([O-])c1c(ccc(c1)C(=O)N)NCc2c(cccc2)OC</chem>                 | Enamine       | 301.3  | 4-[(2-methoxybenzyl)amino]-3-nitrobenzamide                                             |
| <chem>[N+](=O)([O-])c1c(ccc(c1)OC)NC(=O)N2CC(CCC2)O</chem>                  | Sigma-Aldrich | 295.3  | 3-hydroxy-N-(4-methoxy-2-nitrophenyl)-1-piperidinecarboxamide                           |
| <chem>[S](=O)(=O)(NC)c1cc(c(cc1)NC2CCC(CC2)O)[N+](=O)[O-]</chem>            | Enamine       | 329.38 | 4-[(4-hydroxycyclohexyl)amino]-N-methyl-3-nitrobenzenesulfonamide                       |
| <chem>[S](=O)(=O)(C)c1cc(c(cc1)NCCc2ncccc2)[N+](=O)[O-]</chem>              | Enamine       | 321.36 | 4-(methylsulfonyl)-2-nitro-N-[2-(2-pyridinyl)ethyl]aniline                              |
| <chem>[N+](=O)([O-])c1c(ccc(c1)[N+](=O)[O-])NCCOCC(=O)O</chem>              | Sigma-Aldrich | 297.27 | 6-(2,4-dinitroanilino)hexanoic acid                                                     |
| <chem>FC(F)[S](=O)(=O)c1cc(c(cc1)NCc2n[o]c(c2)C)[N+](=O)[O-]</chem>         | Enamine       | 347.3  | 4-[(difluoromethyl)sulfonyl]-N-[(5-methyl-3-isoxazolyl)methyl]-2-nitroaniline           |
| <chem>[S](=O)(=O)(N)c1cc(c(cc1)NCC2Oc3c(cccc3)OC2)[N+](=O)[O-]</chem>       | Enamine       | 365.37 | 4-[(2,3-dihydro-1,4-benzodioxin-2-ylmethyl)amino]-3-nitrobenzenesulfonamide             |
| <chem>[N+](=O)([O-])c1c(ccc(c1)C(=O)C)NCC2CN(CC2)C</chem>                   | Enamine       | 277.32 | 1-(4-[[1-methyl-3-pyrrolidinyl)methyl]amino]-3-nitrophenyl)ethanone                     |
| <chem>[N+](=O)([O-])c1c(ccc(c1)[N+](=O)[O-])NCCC(=O)O</chem>                | Sigma-Aldrich | 255.19 | 3-(2,4-dinitroanilino)propanoic acid                                                    |
| <chem>[N+](=O)([O-])c1cc(c(cc1)NCCc2[nH]nc(c2)O)C(=O)OC</chem>              | Enamine       | 306.28 |                                                                                         |



|                                                                                  |               |        |                                                                                                      |
|----------------------------------------------------------------------------------|---------------|--------|------------------------------------------------------------------------------------------------------|
| <chem>[N+](=O)([O-])c1cc2c(ncnc2O)cc1NCCc3cc(ccc3)O</chem>                       | Enamine       | 326.31 | 7-[[2-(3-hydroxyphenyl)ethyl]amino]-6-nitro-4-quinazolinol                                           |
| <chem>[N+](=O)([O-])c1c(ccc(c1)C(=O)O)Nc2ccc(cc2)OC</chem>                       | ChemDiv       | 288.26 | 4-(4-methoxyanilino)-3-nitrobenzoic acid                                                             |
| <chem>[N+](=O)([O-])c1c(ccc(c1)C(=O)N)NCC(CO)Cc2[o]ccc2</chem>                   | Enamine       | 319.32 | 4-[[3-(2-furyl)-2-(hydroxymethyl)propyl]amino]-3-nitrobenzamide                                      |
| <chem>FC(F)[S](=O)(=O)c1cc(c(cc1)NCc2nc[s]c2)[N+](=O)[O-]</chem>                 | Enamine       | 349.34 | 4-[(difluoromethyl)sulfonyl]-2-nitro-N-(1,3-thiazol-4-ylmethyl)aniline                               |
| <chem>[N+](=O)([O-])c1cc(c(cc1)NCC2OCCOC2)C(=O)OC</chem>                         | Enamine       | 296.28 | methyl 2-[(1,4-dioxan-2-ylmethyl)amino]-5-nitrobenzoate                                              |
| <chem>[N+](=O)([O-])c1cc(c(cc1)NC2CCC(CC2)O)C(=O)OC</chem>                       | Enamine       | 294.31 | methyl 2-[(4-hydroxycyclohexyl)amino]-5-nitrobenzoate                                                |
| <chem>[S](=O)(=O)(C)c1cc(c(cc1)Nc2cnc(cc2)N3CCC3)[N+](=O)[O-]</chem>             | Enamine       | 362.41 | N-[4-(methylsulfonyl)-2-nitrophenyl]-6-(1-pyrrolidinyl)-3-pyridinamine                               |
| <chem>[N+](=O)([O-])c1cc(c(cc1)NCc2c(ccc(c2)OC)OC)C</chem>                       | Vitas-M       | 302.33 | N-(2,5-dimethoxybenzyl)-2-methyl-4-nitroaniline                                                      |
| <chem>[N+](=O)([O-])c1c(ccc(c1)C#N)NCc2c(ccc(c2)OC)OC</chem>                     | Enamine       | 313.31 | 4-[(2,5-dimethoxybenzyl)amino]-3-nitrobenzotrile                                                     |
| <chem>[S](=O)(=O)(NC)c1cc(c(cc1)NCC2(CCC2)O)[N+](=O)[O-]</chem>                  | Enamine       | 315.35 | 4-[[1-(hydroxycyclobutyl)methyl]amino]-N-methyl-3-nitrobenzenesulfonamide                            |
| <chem>[N+](=O)([O-])c1c(ccc(c1)C(=O)C)NC(C)c2ncccc2</chem>                       | Enamine       | 285.3  | 1-(3-nitro-4-[[1-(2-pyridinyl)ethyl]amino]phenyl)ethanone                                            |
| <chem>[N+](=O)([O-])c1cc2c(ncnc2O)cc1NCC3OCCC3</chem>                            | Enamine       | 290.28 | 6-nitro-7-[(tetrahydro-2-furanylmethyl)amino]-4-quinazolinol                                         |
| <chem>[N+](=O)([O-])c1c(ccc(c1)C(=O)OC)NC(C)c2ncccc2</chem>                      | Enamine       | 301.3  | methyl 3-nitro-4-[[1-(2-pyridinyl)ethyl]amino]benzoate                                               |
| <chem>FC(F)[S](=O)(=O)c1cc(c(cc1)NCc2n[nH]c(n2)C)[N+](=O)[O-]</chem>             | Enamine       | 347.3  | 4-[(difluoromethyl)sulfonyl]-N-[(5-methyl-1H-1,2,4-triazol-3-yl)methyl]-2-nitroaniline               |
| <chem>[S](=O)(=O)(C)c1cc(c(cc1)NCC2CN(CC2)COC)[N+](=O)[O-]</chem>                | Enamine       | 357.43 | N-[[1-(2-methoxyethyl)-3-pyrrolidinyl]methyl]-N-[4-(methylsulfonyl)-2-nitrophenyl]amine              |
| <chem>[N+](=O)([O-])c1c(ccc(c1)C(=O)O)NCCc2c3c([nH]c2)ccc3</chem>                | Vitas-M       | 325.32 | 4-[[2-(1H-indol-3-yl)ethyl]amino]-3-nitrobenzoic acid                                                |
| <chem>[N+](=O)([O-])c1c(ccc(c1)C(=O)O)NCCc2cc(c(cc2)O)O</chem>                   | Vitas-M       | 318.29 | 4-(3,4-dihydroxyphenethylamino)-3-nitrobenzoic acid                                                  |
| <chem>[S](=O)(=O)(O)c1c(ccc(c1)[N+](=O)[O-])Nc2ccc(cc2)N</chem>                  | ChemBridge    | 309.3  | 2-(4-aminoanilino)-5-nitrobenzenesulfonic acid                                                       |
| <chem>[N+](=O)([O-])c1cc(c(cc1)NCC2OCCC2)C#N</chem>                              | Enamine       | 247.25 | 5-nitro-2-[(tetrahydro-2-furanylmethyl)amino]benzotrile                                              |
| <chem>[N+](=O)([O-])c1c(ccc(c1)[N+](=O)[O-])NCCCN(C)C</chem>                     | Vitas-M       | 304.73 | N-1~-(2,4-dinitrophenyl)-N~3~,N~3~-dimethyl-1,3-propanediamine                                       |
| <chem>[S](=O)(=O)(C)c1cc(c(cc1)NCC2(CC(CCC2)C)O)[N+](=O)[O-]</chem>              | Enamine       | 342.42 | 3-methyl-1-[[4-(methylsulfonyl)-2-nitroanilino]methyl]cyclohexanol                                   |
| <chem>[N+](=O)([O-])c1c(ccc(c1)c3n[o]c(n3)C)NCc2[o]ccc2</chem>                   | Vitas-M       | 300.27 | N-(2-furylmethyl)-4-(5-methyl-1,2,4-oxadiazol-3-yl)-2-nitroaniline                                   |
| <chem>[S](=O)(=O)(C)c1cc(c(cc1)NCc2[n]3c(nn2)CCC3)[N+](=O)[O-]</chem>            | Enamine       | 337.36 | N-(6,7-dihydro-5H-pyrrolo[2,1-c][1,2,4]triazol-3-ylmethyl)-N-[4-(methylsulfonyl)-2-nitrophenyl]amine |
| <chem>Clc1c(ccc(c1)[N+](=O)[O-])NCc2cc(c(cc2)OC)OC</chem>                        | Enamine       | 322.75 | 2-chloro-N-(3,4-dimethoxybenzyl)-4-nitroaniline                                                      |
| <chem>Fc1c(ccc(c1)[N+](=O)[O-])NCc2ccc(cc2)C(O)C</chem>                          | Enamine       | 290.29 | 1-{4-[(2-fluoro-4-nitroanilino)methyl]phenyl}ethanol                                                 |
| <chem>[N+](=O)([O-])c1ccc(cc1)O[C@@H]2O[C@@H]([C@H]([C@@H]([C@H]2O)O)O)CO</chem> | Sigma-Aldrich | 301.25 | 4-nitrophenyl beta-D-glucopyranoside                                                                 |
| <chem>[N+](=O)([O-])c1c(ccc(c1)C(=O)C)NCCc2c(ccc(c2)C)OC</chem>                  | Enamine       | 328.37 | 1-(4-[[2-(2-methoxy-5-methylphenyl)ethyl]amino]-3-nitrophenyl)ethanone                               |
| <chem>Clc1c(ccc(c1)[N+](=O)[O-])NCc2c(ccc(c2)OC)OC</chem>                        | Enamine       | 322.75 | 2-chloro-N-(2,5-dimethoxybenzyl)-4-nitroaniline                                                      |

|                                                                    |               |        |                                                                                            |
|--------------------------------------------------------------------|---------------|--------|--------------------------------------------------------------------------------------------|
| [N+](=O)([O-])c1c(ccc(c1)OC)NC(=O)N2CCC(CC2)O                      | Enamine       | 295.3  | 4-hydroxy-N-(4-methoxy-2-nitrophenyl)-1-piperidinecarboxamide                              |
| [S](=O)(=O)(NC)c1cc(c(cc1)Nc2cnc(cc2)N(C)C)[N+](=O)[O-]            | Enamine       | 351.39 | 4-[[6-(dimethylamino)-3-pyridinyl]amino]-N-methyl-3-nitrobenzenesulfonamide                |
| [S]1(=O)(=O)N=C(c3c1cc(cc3)[N+](=O)[O-])Nc2cc(ccc2)N               | Vitas-M       | 318.31 |                                                                                            |
| [S](=O)(=O)(C)c1cc(c(cc1)NC(C)c2cc3c(cc2)OCO3)[N+](=O)[O-]         | Enamine       | 364.38 | N-[1-(1,3-benzodioxol-5-yl)ethyl]-4-(methylsulfonyl)-2-nitroaniline                        |
| [N+](=O)([O-])c1cc(c(cc1)NCc2nc(n[o]2)C(OCC)C)C#N                  | Enamine       | 317.3  | 2-([3-(1-ethoxyethyl)-1,2,4-oxadiazol-5-yl]methyl)amino)-5-nitrobenzonitrile               |
| [N+](=O)([O-])c1c(ccc(c1)C#N)NC2CCC(CC2)O                          | Enamine       | 261.28 | 4-[(4-hydroxycyclohexyl)amino]-3-nitrobenzonitrile                                         |
| [N+](=O)([O-])c1c(ccc(c1)[N+](=O)[O-])NC(C(O)C)C(=O)O              | Sigma-Aldrich | 285.21 | 2-(2,4-dinitroanilino)-3-hydroxybutanoic acid                                              |
| [S](=O)(=O)(C)c1cc(c(cc1)NCC2N(CCC2)C(C)[N+](=O)[O-]               | Enamine       | 327.4  | N-[(1-ethyl-2-pyrrolidinyl)methyl]-4-(methylsulfonyl)-2-nitroaniline                       |
| [N+](=O)([O-])c1ccc(cc1)N[C@@H]2O[C@@H]([C@H]([C@@H]([C@@H]2O)O)CO | Vitas-M       | 300.27 | N-(4-nitrophenyl)-beta-D-mannopyranosylamine                                               |
| BrC1c(cc(c(c1)NCC(O)C(O)C(O)CO)[N+](=O)[O-])C                      | Sigma-Aldrich | 365.18 | 1-(5-bromo-4-methyl-2-nitroanilino)-1-deoxy-D-ribitol                                      |
| [N+](=O)([O-])c1cc(c(cc1)Nc2ccc(cc2)C(=O)OC)C(=O)OC                | Enamine       | 344.32 | methyl 2-[[4-(methoxycarbonyl)benzyl]amino]-5-nitrobenzoate                                |
| [s]1c(nc(c1)CNc2c(cc(cc2)C(=O)NC)[N+](=O)[O-])NC                   | Enamine       | 321.36 | N-methyl-4-([2-(methylamino)-1,3-thiazol-4-yl]methyl)amino)-3-nitrobenzamide               |
| [S](=O)(=O)(C)c1cc(c(cc1)Nc2cc(cc(c2)OC)OC)[N+](=O)[O-]            | Enamine       | 352.37 | N-(3,5-dimethoxyphenyl)-4-(methylsulfonyl)-2-nitroaniline                                  |
| [N+](=O)([O-])c1c(ccc(c1)C(=O)C)NCCc2c3c([nH]c2O)cc3               | Enamine       | 339.35 | 3-[2-(4-acetyl-2-nitroanilino)ethyl]-1,3-dihydro-2H-indol-2-one                            |
| [S]1(=O)(=O)N=C(c3c1cc(cc3)[N+](=O)[O-])Nc2c(ccc(c2)OC)OC          | Vitas-M       | 363.35 | N-(2,5-dimethoxyphenyl)-6-nitro-1,2-benzisothiazol-3-amine 1,1-dioxide                     |
| S1c2[n](cc(n2)CNc3c(cc(cc3)C(=O)OC)[N+](=O)[O-])C=C1               | Enamine       | 332.34 | methyl 4-[(imidazo[2,1-b][1,3]thiazol-6-ylmethyl)amino]-3-nitrobenzoate                    |
| [S](=O)(=O)(NC)c1cc(c(cc1)NCC2Oc3c(ccc3)OC2)[N+](=O)[O-]           | Enamine       | 379.39 | 4-[(2,3-dihydro-1,4-benzodioxin-2-ylmethyl)amino]-N-methyl-3-nitrobenzenesulfonamide       |
| [n]2(cnc(c2N)C(=O)N)C1OC(C(C1O)O)CO                                | AMS Private   | 258.23 | 5-amino-1-(3,4-dihydroxy-5-(hydroxymethyl)tetrahydrofuran-2-yl)-1H-imidazole-4-carboxamide |
| [S]1(=O)(=O)N=C(c3c1cc(cc3)[N+](=O)[O-])Nc2cc(ccc2)C(=O)C          | Vitas-M       | 345.34 | 1-{3-[(6-nitro-1,1-dioxido-1,2-benzisothiazol-3-yl)amino]phenyl}ethanone                   |
| Clc1ccc(cc1)C(O)CNc2c(cc(cc2)C(=O)C)[N+](=O)[O-]                   | Enamine       | 334.76 | 1-(4-[[2-(4-chlorophenyl)-2-hydroxyethyl]amino]-3-nitrophenyl)ethanone                     |
| [S](=O)(=O)(C)c1c(ccc(c1)[S](=O)(=O)C)NC2OCCC2                     | Enamine       | 333.43 | 2,4-bis(methylsulfonyl)-N-(tetrahydro-2-furanylmethyl)aniline                              |
| Clc1c(ccc(c1)[N+](=O)[O-])Nc2c(nc(cc2)C)O                          | Enamine       | 307.74 | 3-[(2-chloro-4-nitroanilino)methyl]-4,6-dimethyl-2-pyridinol                               |
| Fc1c(c(cc(c1)C(=O)OC)[N+](=O)[O-])NCC2OCCC2                        | Enamine       | 298.27 | methyl 3-fluoro-5-nitro-4-[(tetrahydro-2-furanylmethyl)amino]benzoate                      |
| Fc1c(ccc(c1)CNc2c(cc(cc2)F)[N+](=O)[O-])CO                         | Enamine       | 294.26 | {2-fluoro-4-[(4-fluoro-2-nitroanilino)methyl]phenyl}methanol                               |
| Clc1c(cccc1)CNc2c(cc(cc2)[N+](=O)[O-])C(=O)O                       | Enamine       | 306.71 | 2-[(2-chlorobenzyl)amino]-5-nitrobenzoic acid                                              |
| [N+](=O)([O-])c1c(ccc(c1)C(=O)OCC)NCc2ccc(cc2)OC                   | ChemDiv       | 330.34 | ethyl 4-[(4-methoxybenzyl)amino]-3-nitrobenzoate                                           |
| [N+](=O)([O-])c1c(ccc(c1)C(=O)OC)NCc2nc3[n](c2)C=C=C3              | Enamine       | 326.31 | methyl 4-[(imidazo[1,2-a]pyridin-2-ylmethyl)amino]-3-nitrobenzoate                         |

|                                                                               |                |               |                                                                               |
|-------------------------------------------------------------------------------|----------------|---------------|-------------------------------------------------------------------------------|
| <chem>[N+](=O)([O-])c1cc(c(cc1)NCc2c(cc(cc2)OC)OC)C</chem>                    | Vitas-M        | 302.33        | N-(2,4-dimethoxybenzyl)-2-methyl-4-nitroaniline                               |
| <chem>Clc1ccc(cc1)CN[C@@H]2OC([C@H](C(C2O)O)O)CO</chem>                       | ChemDiv        | 303.74        | N-(4-chlorobenzyl)-beta-D-glycero-hexopyranosylamine                          |
| <chem>Fc1ccc(cc1)CNc2c(cc(cc2)C(=O)N)[N+](=O)[O-]</chem>                      | Enamine        | 289.27        | 4-[(4-fluorobenzyl)amino]-3-nitrobenzamide                                    |
| <chem>[N+](=O)([O-])c1cc(c(cc1)NCc2ccc(cc2)OC)C#N</chem>                      | Enamine        | 283.29        | 2-[(4-methoxybenzyl)amino]-5-nitrobenzonitrile                                |
| <chem>[N+](=O)([O-])c1c(ccc(c1)C(=O)O)Nc2ccc(cc2)C</chem>                     | Vitas-M        | 272.26        | 3-nitro-4-(4-toluidino)benzoic acid                                           |
| <chem>[N+](=O)([O-])c1cc(c(cc1)N)C=C2/CCCC/2=O)OC</chem>                      | Vitas-M        | 262.27        | (2E)-2-[(2-methoxy-4-nitroanilino)methylene]cyclopentanone                    |
| <chem>FC(F)(F)c1cc(c(cc1)NCc2ccc(cc2)OC)[N+](=O)[O-]</chem>                   | Enamine        | 326.28        | N-(4-methoxybenzyl)-2-nitro-4-(trifluoromethyl)aniline                        |
| <chem>S(c2nc(cc(n2)O)N)c1c(cc(cc1)C(=O)C)[N+](=O)[O-]</chem>                  | Labotest       | 306.3         | 1-{4-[(4-amino-6-hydroxy-2-pyrimidinyl)sulfanyl]-3-nitrophenyl}ethanone       |
| <chem>[N+](=O)([O-])c1c(ccc(c1)C(=O)N)NCc2ccc(cc2)C</chem>                    | Enamine        | 285.3         | 4-[(4-methylbenzyl)amino]-3-nitrobenzamide                                    |
| <chem>[S](=O)(=O)(C)c1cc(c(cc1)Sc2nc(cc(n2)C)C)[N+](=O)[O-]</chem>            | Enamine        | 339.4         | 4,6-dimethyl-2-[[4-(methylsulfonyl)-2-nitrophenyl]sulfanyl]pyrimidine         |
| <b><chem>[S](=O)(=O)(C)c1cc(c(cc1)Nc2cc3c(cc2)OC(=O)N)[N+](=O)[O-]</chem></b> | <b>Enamine</b> | <b>336.33</b> | <b>N-[4-(methylsulfonyl)-2-nitrophenyl]-1,3-benzodioxol-5-amine, MSNBA</b>    |
| <chem>[N+](=O)([O-])c1c(ccc(c1)C(=O)O)NCCC2=CCCC2</chem>                      | ChemDiv        | 290.32        | 4-[[2-(1-cyclohexen-1-yl)ethyl]amino]-3-nitrobenzoic acid                     |
| <chem>[N+](=O)([O-])c1cc(c(cc1)NCc2cnc(cc2)C(=O)O</chem>                      | ChemBridge     | 273.25        | 5-nitro-2-[(3-pyridinylmethyl)amino]benzoic acid                              |
| <chem>[S](=O)(=O)(N)c1cc(c(cc1)NCc2cccc2)[N+](=O)[O-]</chem>                  | ChemBridge     | 307.33        | 4-(benzylamino)-3-nitrobenzenesulfonamide                                     |
| <chem>[S](=O)(=O)(C)c1cc(c(cc1)NC(C)c2[s]ccc2)[N+](=O)[O-]</chem>             | Enamine        | 326.4         | 4-(methylsulfonyl)-2-nitro-N-[1-(2-thienyl)ethyl]aniline                      |
| <chem>Clc1ccc(cc1)CNc2c(cc(cc2)C(=O)N)[N+](=O)[O-]</chem>                     | Enamine        | 305.72        | 4-[(4-chlorobenzyl)amino]-3-nitrobenzamide                                    |
| <chem>Fc1c(ccc(c1)[N+](=O)[O-])NCc2cc(c(cc2)CO)F</chem>                       | Enamine        | 294.26        | {2-fluoro-4-[(2-fluoro-4-nitroanilino)methyl]phenyl}methanol                  |
| <chem>[N+](=O)([O-])c1c(ccc(c1)C(=O)C)NCC2CCN(CC2)CC</chem>                   | Enamine        | 305.38        | 1-(4-[(1-ethyl-4-piperidinyl)methyl]amino)-3-nitrophenyl)ethanone             |
| <chem>[N+](=O)([O-])c1c(ccc(c1)C(=O)C)NCc2cc(ncc2)OC</chem>                   | Enamine        | 301.3         | 1-(4-[(2-methoxy-4-pyridinyl)methyl]amino)-3-nitrophenyl)ethanone             |
| <chem>Fc1c(ccc(c1)CNc2c(cc(cc2)[N+](=O)[O-])Cl)CO</chem>                      | Enamine        | 310.71        | {4-[(2-chloro-4-nitroanilino)methyl]-2-fluorophenyl}methanol                  |
| <chem>[N+](=O)([O-])c1cc(c(cc1)NCC2Oc3c(cccc3)OC2)C(=O)OC</chem>              | Enamine        | 344.32        | methyl 2-[(2,3-dihydro-1,4-benzodioxin-2-ylmethyl)amino]-5-nitrobenzoate      |
| <chem>Clc1c(c(cc(c1)Cl)C(=O)Nc2c(cc(cc2)[N+](=O)[O-])OC)O</chem>              | Vitas-M        | 357.15        | 3,5-dichloro-2-hydroxy-N-(2-methoxy-4-nitrophenyl)benzamide                   |
| <chem>[S](=O)(=O)(C)c1cc(c(cc1)NCC2(CCC2)O)[N+](=O)[O-]</chem>                | Enamine        | 300.34        | 1-[[4-(methylsulfonyl)-2-nitroanilino]methyl]cyclobutanol                     |
| <chem>[N+](=O)([O-])c1cc(c(cc1)N)C=C2\CCCC\2=O)OC</chem>                      | ChemBridge     | 276.29        | (2Z)-2-[(2-methoxy-4-nitroanilino)methylene]cyclohexanone                     |
| <chem>Clc1cc(c(cc1)O)C(=O)Nc2c(cc(cc2)OC)[N+](=O)[O-]</chem>                  | Sigma-Aldrich  | 322.7         | 5-chloro-2-hydroxy-N-(4-methoxy-2-nitrophenyl)benzamide                       |
| <chem>[s]1c(nc(c1CC(=O)Nc2c(cc(cc2)OCC)[N+](=O)[O-])O)N</chem>                | Vitas-M        | 338.34        | N-(4-ethoxy-2-nitrophenyl)-2-(2-imino-4-oxo-1,3-thiazolidin-5-yl)acetamide    |
| <chem>[S](=O)(=O)(NC)c1cc(c(cc1)NCc2cc(ncc2)OC)[N+](=O)[O-]</chem>            | Enamine        | 352.37        | 4-[[2-(2-methoxy-4-pyridinyl)methyl]amino]-N-methyl-3-nitrobenzenesulfonamide |
| <chem>[N+](=O)([O-])c1cc(c(cc1)NCc2cc(ccc2)OCC)C#N</chem>                     | Enamine        | 297.31        | 2-[(3-ethoxybenzyl)amino]-5-nitrobenzonitrile                                 |
| <chem>[s]1c(nc(c1CC(=O)Nc2c(cc(cc2)OC)[N+](=O)[O-])O)N</chem>                 | Vitas-M        | 324.32        | 2-(2-imino-4-oxo-1,3-thiazolidin-5-yl)-N-(4-methoxy-2-nitrophenyl)acetamide   |
| <chem>[N+](=O)([O-])c1c(ccc(c1)C(=O)OCC)NCc2c(cccc2)OC</chem>                 | ChemDiv        | 330.34        | ethyl 4-[(2-methoxybenzyl)amino]-3-nitrobenzoate                              |

|                                                                                  |                        |        |                                                                                 |
|----------------------------------------------------------------------------------|------------------------|--------|---------------------------------------------------------------------------------|
| <chem>FC(F)(F)c1cc(c(cc1)NC2CCC(CC2)O)[N+](=O)[O-]</chem>                        | Enamine                | 304.27 | 4-[2-nitro-4-(trifluoromethyl)anilino]cyclohexanol                              |
| <chem>[N+](=O)([O-])c1cc(c(cc1)NC2OC(C(C2)O)CO)C</chem>                          | ChemBridge             | 268.27 | 2-deoxy-N-(2-methyl-4-nitrophenyl)pentofuranosylamine                           |
| <chem>Fc1c(cccc1)C(O)CNc2c(cc(cc2)C(=O)C)[N+](=O)[O-]</chem>                     | Enamine                | 318.3  | 1-(4-[[2-(2-fluorophenyl)-2-hydroxyethyl]amino]-3-nitrophenyl)ethanone          |
| <chem>[s]1c(nnc1N)Sc2c(cc(cc2)[N+](=O)[O-])C(=O)O</chem>                         | Labotest               | 298.3  | 2-[[5-amino-1,3,4-thiadiazol-2-yl)sulfanyl]-5-nitrobenzoic acid                 |
| <chem>Clc1c(cccc1)CCNc2c(cc(cc2)C(=O)O)[N+](=O)[O-]</chem>                       | ChemDiv                | 320.73 | 4-[[2-(2-chlorophenyl)ethyl]amino]-3-nitrobenzoic acid                          |
| <chem>[N+](=O)([O-])c1cc(c(cc1)NCc2cnc2)C(=O)N</chem>                            | Vitas-M                | 272.26 | 5-nitro-2-[(3-pyridinylmethyl)amino]benzamide                                   |
| <chem>Fc1ccc(cc1)CNc2c(cc(cc2)C(=O)OCC)[N+](=O)[O-]</chem>                       | ChemDiv                | 318.3  | ethyl 4-[(4-fluorobenzyl)amino]-3-nitrobenzoate                                 |
| <chem>[S](=O)(=O)(C)c1cc(c(cc1)NC(C)c2ccccc2)[N+](=O)[O-]</chem>                 | Vitas-M                | 320.37 | 4-(methylsulfonyl)-2-nitro-N-(1-phenylethyl)aniline                             |
| <chem>[n]2(ncnc2)C1OC(C(C1O)O)COC</chem>                                         | AMS Private Supplier 1 | 215.21 |                                                                                 |
| <chem>O1[C@H](C(C(C1CO)O)O)OCc2ccccc2</chem>                                     | Sigma-Aldrich          | 240.26 | benzyl beta-D-ribofuranoside                                                    |
| <chem>[S](=O)(=O)(C)c1cc(c(cc1)Sc2[s]cc(n2)C)[N+](=O)[O-]</chem>                 | Enamine                | 330.41 | methyl 4-[(4-methyl-1,3-thiazol-2-yl)sulfanyl]-3-nitrophenyl sulfone            |
| <chem>Fc1c(ccc(c1)[N+](=O)[O-])NCC2OCCC2</chem>                                  | Enamine                | 240.23 | N-(2-fluoro-4-nitrophenyl)-N-(tetrahydro-2-furanylmethyl)amine                  |
| <chem>[S](=O)(=O)(C)c1c(ccc(c1)[S](=O)(=O)C)NCC2OCCC2</chem>                     | Enamine                | 347.46 | 2,4-bis(methylsulfonyl)-N-(2-tetrahydro-2-furanylethyl)aniline                  |
| <chem>Clc1c(ccc(c1)[N+](=O)[O-])NCc2cnc2</chem>                                  | Enamine                | 263.68 | 2-chloro-4-nitro-N-(2-pyridinylmethyl)aniline                                   |
| <chem>[N+](=O)([O-])c1c(cccc1)O[C@@H]2O[C@@H]([C@H]([C@@H]([C@H]2O)O)O)CO</chem> | Sigma-Aldrich          | 301.25 | 2-nitrophenyl beta-D-glucopyranoside                                            |
| <chem>Clc1c(c(cc(c1)Cl)C(=O)Nc2c(cc(cc2)OC)[N+](=O)[O-])O</chem>                 | Sigma-Aldrich          | 357.15 | 3,5-dichloro-2-hydroxy-N-(4-methoxy-2-nitrophenyl)benzamide                     |
| <chem>[N+](=O)([O-])c1cc(c(cc1)NC2CCC(CC2)O)C#N</chem>                           | Enamine                | 261.28 | 2-[(4-hydroxycyclohexyl)amino]-5-nitrobenzoxazole                               |
| <chem>[S](=O)(=O)(NC)c1cc(c(cc1)NC(C)c2cc3c(cc2)OCO3)[N+](=O)[O-]</chem>         | Enamine                | 379.39 | 4-[[1-(1,3-benzodioxol-5-yl)ethyl]amino]-N-methyl-3-nitrobenzenesulfonamide     |
| <chem>Fc1cc(c(cc1)NCc2nc([s]c2)NC)[N+](=O)[O-]</chem>                            | Enamine                | 282.3  | N-{4-[(4-fluoro-2-nitroanilino)methyl]-1,3-thiazol-2-yl}-N-methylamine          |
| <chem>Clc1c(cc(c(c1)[N+](=O)[O-])NCC(O)C(O)C(O)CO)CC</chem>                      | Sigma-Aldrich          | 334.76 | 1-(4-chloro-5-ethyl-2-nitroanilino)-1-deoxyxypentitol                           |
| <chem>[N+](=O)([O-])c1c(ccc(c1)C(=O)C)NCC2N(CCC2)C</chem>                        | Enamine                | 277.32 | 1-(4-[[1-(1-methyl-2-pyrrolidinyl)methyl]amino]-3-nitrophenyl)ethanone          |
| <chem>[s]1c(nc(c1)C)Sc2c(cc(cc2)[N+](=O)[O-])C(=O)O</chem>                       | Enamine                | 296.33 | 2-[[4-methyl-1,3-thiazol-2-yl)sulfanyl]-5-nitrobenzoic acid                     |
| <chem>[N+](=O)([O-])c1c(ccc(c1)C(=O)C)NCCc2ccc(cc2)OC</chem>                     | Enamine                | 314.34 | 1-(4-[[2-(4-methoxyphenyl)ethyl]amino]-3-nitrophenyl)ethanone                   |
| <chem>FC(F)(F)c1cc(c(cc1)NCC(CO)C2[o]ccc2)[N+](=O)[O-]</chem>                    | Enamine                | 344.29 | 3-(2-furyl)-2-[[2-nitro-4-(trifluoromethyl)anilino]methyl]-1-propanol           |
| <chem>S(c2nc(cc(n2)O)O)c1c(cc(cc1)C(=O)N)[N+](=O)[O-]</chem>                     | Labotest               | 308.27 | 4-[(4,6-dihydroxy-2-pyrimidinyl)sulfanyl]-3-nitrobenzamide                      |
| <chem>FC(F)(F)c1cc(c(cc1)NCc2cc(c(cc2)OC)Cl)[N+](=O)[O-]</chem>                  | Key Organics / BIONET  | 360.72 | N-(3-chloro-4-methoxybenzyl)-2-nitro-4-(trifluoromethyl)aniline                 |
| <chem>[N+](=O)([O-])c1c(ccc(c1)c3nc(n[g]3)C)NCC2OCCC2</chem>                     | ChemDiv                | 304.31 | 4-(3-methyl-1,2,4-oxadiazol-5-yl)-2-nitro-N-(tetrahydro-2-furanylmethyl)aniline |
| <chem>[S](=O)(=O)(C)c1cc(c(cc1)NCCc2ccccc2)[N+](=O)[O-]</chem>                   | Enamine                | 320.37 | 4-(methylsulfonyl)-2-nitro-N-(2-phenylethyl)aniline                             |
| <chem>S(c2nc(cc(n2)O)N)c1c(cc(cc1)C(=O)N)[N+](=O)[O-]</chem>                     | Labotest               | 307.29 | 4-[(4-amino-6-hydroxy-2-pyrimidinyl)sulfanyl]-3-nitrobenzamide                  |
| <chem>N(C2OC(C(C2O)O)O)CO)c1ncccc1</chem>                                        | Vitas-M                | 256.26 | N-(2-pyridinyl)hexopyranosylamine                                               |

|                                                                                     |               |        |                                                                                                                                      |
|-------------------------------------------------------------------------------------|---------------|--------|--------------------------------------------------------------------------------------------------------------------------------------|
| <chem>O1[C@H]([C@@H]([C@H]([C@@H]([C@H]1CO)O)O)O)Oc2ccccc2</chem>                   | Sigma-Aldrich | 256.26 | phenyl beta-D-glucopyranoside                                                                                                        |
| <chem>[S](=O)(=O)(OC)O.N2(C=CC(=N)N(C2=O)C)[C@@H]1O[C@@H]([C@H]([C@H]1O)O)CO</chem> | Sigma-Aldrich | 369.35 | 1-((2R,3R,4S,5R)-3,4-dihydroxy-5-(hydroxymethyl)tetrahydrofuran-2-yl)-4-imino-3-methyl-3,4-dihydropyrimidin-2(1H)-one methyl sulfate |
| <chem>Brc1ccc(cc1)N[C@@H]2OC[C@H](C(C2O)O)O</chem>                                  | Vitas-M       | 304.14 | N-(4-bromophenyl)-beta-D-glycero-pentopyranosylamine                                                                                 |
| <chem>[N+](=O)([O-])c1cc(ccc1)NC2OC(C(C2O)O)CO</chem>                               | Vitas-M       | 270.24 | N-(3-nitrophenyl)pentofuranosylamine                                                                                                 |
| <chem>S([C@@H]2O[C@@H]([C@H]([C@@H]([C@H]2O)O)O)CO)c1ccc(cc1)C</chem>               | Sigma-Aldrich | 286.35 | 4-methylphenyl 1-thio-beta-D-glucopyranoside                                                                                         |
| <chem>[N+](=O)([O-])c1ccc(cc1)O[C@@H]2O[C@H]([C@@H]([C@H]2O)O)CO</chem>             | Sigma-Aldrich | 271.23 | 4-nitrophenyl alpha-L-arabinofuranoside                                                                                              |
